# Supplementary material
Source: PubMed Central journal article supplement (PMC4178605)

1 Supplementary material

2 Fig. 1S. Kinetics of H<sub>2</sub> photoproduction by *Anabaena* PCC 7120 (A) and  $\Delta hupL$  (B) cells entrapped in  
3 thin Ca<sup>2+</sup>-alginate films under Ar, Air or N<sub>2</sub> atmospheres supplemented with 6% CO<sub>2</sub>. Arrows indicate  
4 the points of atmosphere regeneration in the vials. The average values from three films are presented  $\pm$   
5 the SD.

6 Fig. 2S. Growth of cells starting at different initial cell densities. The suspension cultures were grown  
7 diazotrophically in 24-well plates under 50  $\mu\text{mol m}^{-2} \text{s}^{-1}$  and air atmosphere. The average values from  
8 three biological replicates are presented  $\pm$  the SD.

9

10

11 Fig 1S

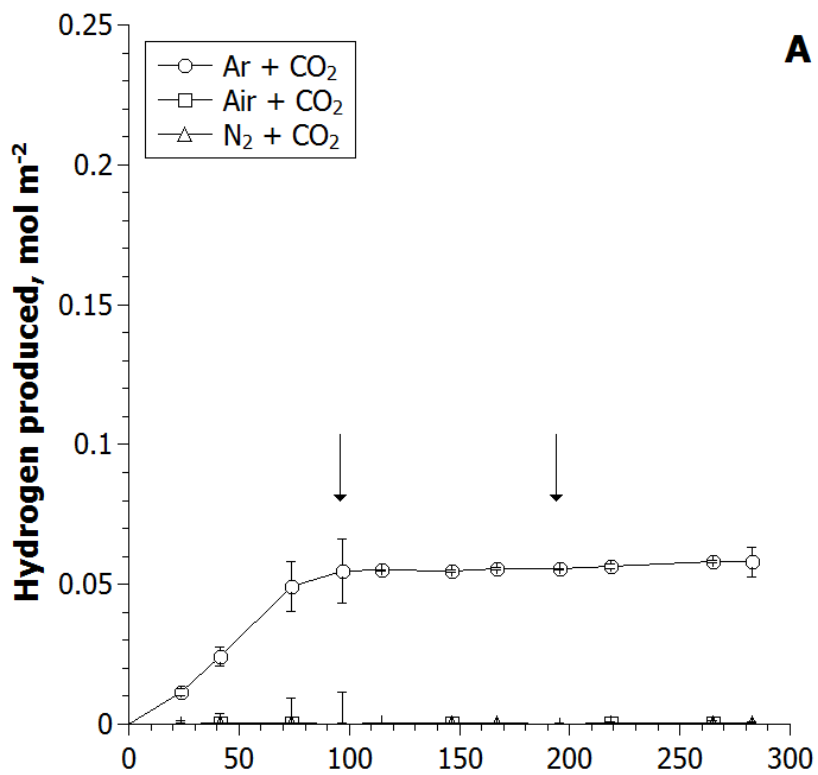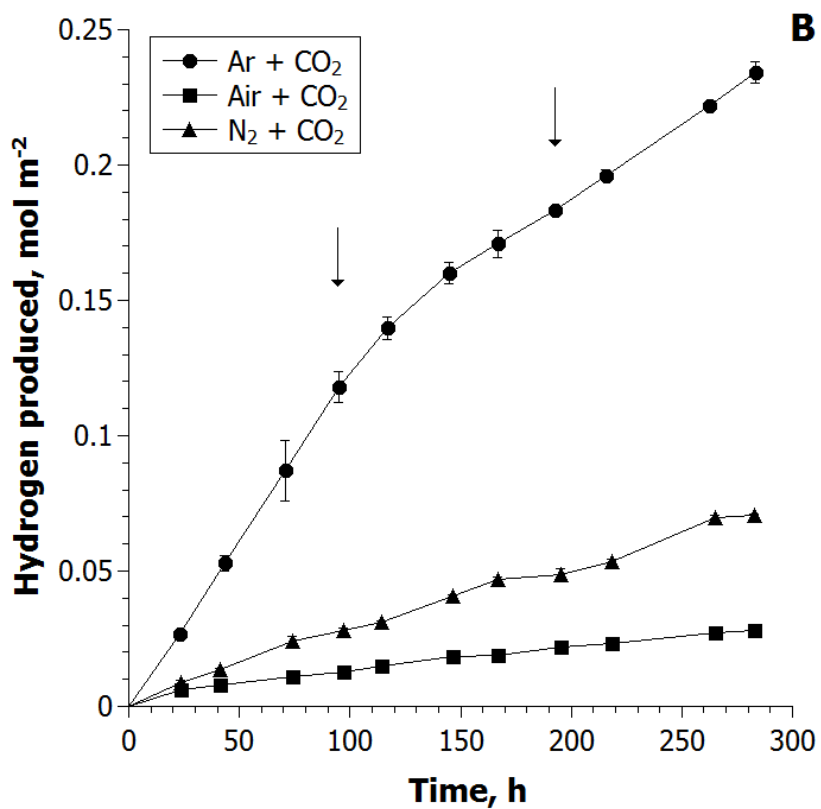

Fig. 2S.

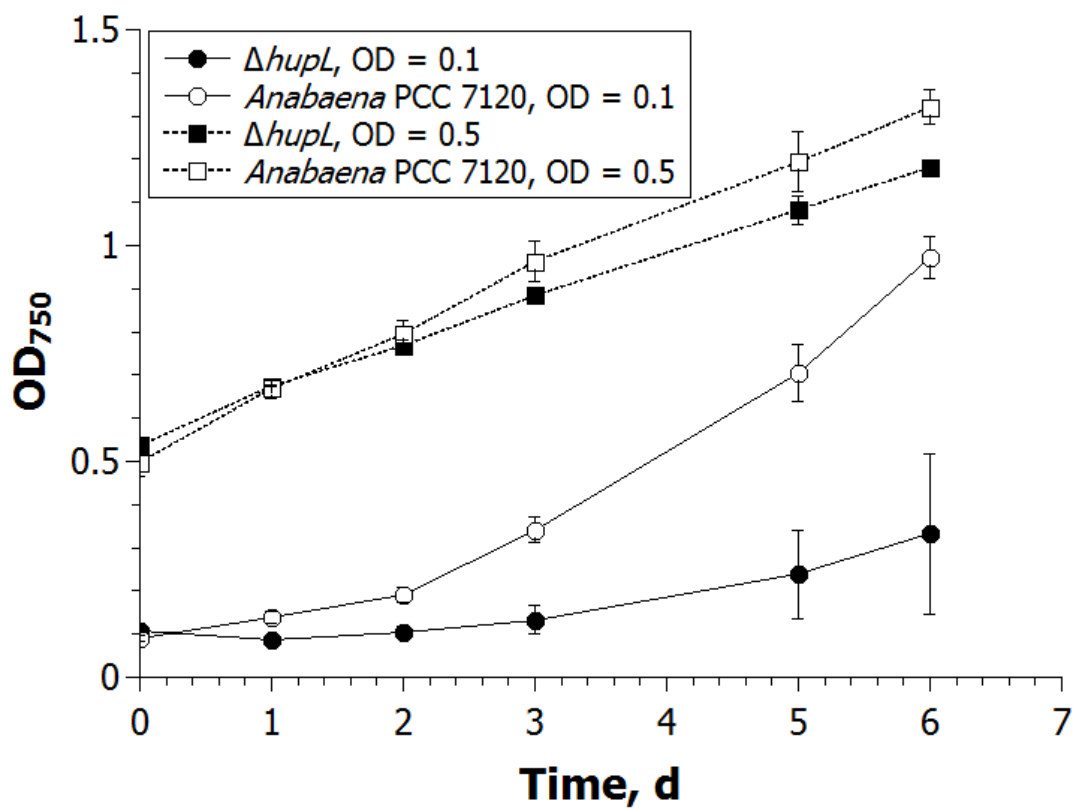

Supplement: AEM.01776-14_zam999105655so1.pdf [file AEM.01776-14_zam999105655so1.pdf]
